# Supplementary material for: Guanfacine Augmentation of a Combined Intervention of Computerized Cognitive Remediation Therapy and Social Skills Training for Schizotypal Personality Disorder
Source: Atypon-hosted journal article supplement (doi:10.1176/appi.ajp.2018.18030349), 2019-01-18
Supplement: appi.ajp.2018.18030349.ds001.pdf [file appi.ajp.2018.18030349.ds001.pdf]

Online supplement for McClure et al., Guanfacine Augmentation of a Combined Intervention of Computerized Cognitive Remediation Therapy and Social Skills Training for Schizotypal Personality Disorder. Am J Psychiatry (doi: 10.1176/appi.ajp.2018.18030349)

**Raw Scores for Supplemental Neuropsychological Tests by group.**

| Supplemental Assessments       | COGNITIVE REMEDIATION THERAPY+SOCIAL SKILLS TRAINING Plus Guanfacine |       |           |       | COGNITIVE REMEDIATION THERAPY+SOCIAL SKILLS TRAINING Plus Placebo |       |           |       | ANOVA Results |          |                   |          |
|--------------------------------|----------------------------------------------------------------------|-------|-----------|-------|-------------------------------------------------------------------|-------|-----------|-------|---------------|----------|-------------------|----------|
|                                | Baseline                                                             |       | Post-Test |       | Baseline                                                          |       | Post-Test |       | Time          |          | Time x Medication |          |
|                                | Mean                                                                 | SD    | Mean      | SD    | Mean                                                              | SD    | Mean      | SD    | <i>F</i>      | <i>p</i> | <i>F</i>          | <i>P</i> |
| PASAT                          | 33.93                                                                | 13.19 | 37.29     | 12.48 | 30.46                                                             | 13.48 | 32.00     | 14.08 | 2.82          | 0.11     | 0.39              | 0.54     |
| DOT Test <sup>a</sup>          | 1.51                                                                 | 0.88  | 1.37      | 1.11  | 1.63                                                              | 1.43  | 1.13      | 1.23  | 1.32          | 0.26     | 0.43              | 0.26     |
| AX-CPT d'-context <sup>b</sup> | 1.69                                                                 | 1.56  | 1.06      | 1.44  | -0.08                                                             | 0.65  | -0.05     | 0.76  | 0.93          | 0.35     | 1.10              | 0.31     |
| N-Back: 2-Back <sup>b</sup>    | 0.79                                                                 | 0.13  | 0.76      | 0.09  | 0.64                                                              | 0.14  | 0.64      | 0.10  | 0.28          | 0.60     | 0.38              | 0.55     |

*a*: Higher scores reflect more errors

*b*: Due to a computer failure, data was only available for 14 participants
